1 Novel reference transcriptomes for the  
2 sponges *Carteriospongia foliascens* and  
3 *Cliona orientalis* and associated algal  
4 symbiont *Gerakladium endoclionum*

5 Brian W. Strehlow<sup>\*1,2,3,4,5,6</sup>, Mari-Carmen Pineda<sup>5,6</sup>, Carly D. Kenkel<sup>5,7</sup>, Patrick Laffy<sup>5</sup>, Alan Duckworth<sup>5,6</sup>,  
6 Michael Renton<sup>2,8</sup>, Peta L. Clode<sup>2,3,4</sup>, Nicole S Webster<sup>5,6,9</sup>  
7 \*corresponding author

8 Author emails, respectively: [strehow@biology.sdu.dk](mailto:strehow@biology.sdu.dk), [mcarmen.pineda@gmail.com](mailto:mcarmen.pineda@gmail.com), [ckenkel@usc.edu](mailto:ckenkel@usc.edu),  
9 [plaffy@aims.gov.au](mailto:plaffy@aims.gov.au), [aduckworth1@gmail.com](mailto:aduckworth1@gmail.com), [michael.renton@uwa.edu.au](mailto:michael.renton@uwa.edu.au), [peta.clode@uwa.edu.au](mailto:peta.clode@uwa.edu.au),  
10 [N.Webster@aims.gov.au](mailto:N.Webster@aims.gov.au)

11

12 <sup>1</sup> Current address: Department of Biology, Nordcee, University of Southern Denmark, Campusvej 55, 5230  
13 Odense, Denmark

14 <sup>2</sup> School of Biological Sciences, University of Western Australia, 35 Stirling Hwy, Crawley WA 6009, Australia

15 <sup>3</sup> Centre for Microscopy, Characterisation and Analysis, University of Western Australia, 35 Stirling Hwy,  
16 Crawley WA 6009, Australia

17 <sup>4</sup> Oceans Institute, University of Western Australia, 35 Stirling Hwy, Crawley WA 6009, Australia

18 <sup>5</sup> Australian Institute of Marine Science, PMB No 3, Townsville MC, Queensland 48106 Western Australian  
19 Marine Science Institution, Crawley, WA, Australia

20 <sup>6</sup> Western Australian Marine Science Institution, 35 Stirling Hwy, Crawley WA 6009, Australia

21 <sup>7</sup> Department of Biological Sciences, University of Southern California, 3616 Trousdale Parkway, Los Angeles,  
22 CA 90089, USA

23 <sup>8</sup> School of Agriculture and Environment, University of Western Australia, 35 Stirling Hwy, Crawley WA 6009,  
24 Australia

25 <sup>9</sup> Australian Centre for Ecogenomics, School of Chemistry and Molecular Biosciences, The University of  
26 Queensland, Brisbane, QLD, Australia

27

## 28 **Abstract**

29 Transcriptomes from sponges are important resources for studying the stress responses of these  
30 ecologically important filter feeders, the interactions between sponges and their symbionts, and the  
31 evolutionary history of metazoans. Here, we generated reference transcriptomes for two common and  
32 cosmopolitan Indo-Pacific sponge species: *Carteriospongia foliascens* and *Cliona orientalis*. We also created  
33 a reference transcriptome for the primary symbiont of *C. orientalis* – *Gerakladium endoclionum*. To ensure  
34 a full repertoire of transcripts were included, clones of each sponge species were exposed to a range of  
35 individual stressors: decreased salinity, elevated temperature, elevated suspended sediment  
36 concentrations, sediment deposition and light attenuation. RNA extracted from all treatments was pooled  
37 for each species, using equal concentrations from each clone. Sequencing of pooled RNA yielded 409 and  
38 418 million raw reads for *C. foliascens* and *C. orientalis* holobionts (host and symbionts), respectively. Reads  
39 underwent quality trimming before assembly with Trinity. Assemblies were filtered into sponge-specific or,  
40 for *G. endoclionum*, symbiont-specific assemblies. Assemblies for *C. foliascens*, *C. orientalis*, and *G.*  
41 *endoclionum* contained 67,304, 82,895, and 28,670 contigs, respectively. Contigs represented 15,248-  
42 37,344 isogroups (~genes) per assembly, and N50s ranged 1,672-4,355 bp. Gene ortholog analysis verified a  
43 high level of completeness and quality for sponge-specific transcriptomes, with an average 93% of core  
44 EuKaryotic Orthologous Groups (KOGs) and 98% of single-copy metazoan core gene orthologs identified.  
45 The *G. endoclionum* assembly was partial with only 56% of core KOGs and 32% of single-copy eukaryotic  
46 core gene orthologs identified. These reference transcriptomes are a valuable resource for future  
47 molecular research aimed at assessing sponge stress responses.

## 48 **Keywords**

49 Porifera, transcriptome, sponge, *Cliona orientalis*, *Carteriospongia foliascens*, *Gerakladium endoclionum*

## 50 **Data Description**

51 Sponges, phylum Porifera, represent one of the oldest lineages of multicellular animals [1], hence  
52 investigating the transcriptomes of different sponge species can provide insight into the evolution of  
53 metazoans and their gene expression profiles. Furthermore, sponges have an uncertain future in the face of  
54 global climate change [2,3] as well as local stressors including coastal development, altered hydrological  
55 processes, and increased runoff of nutrients, pesticides and sediments [4–7]. Transcriptomic analysis of  
56 sponges that have been exposed to different environmental conditions would improve our understanding  
57 of the sponge molecular stress response pathways and enhance our ability to effectively manage these  
58 ecologically important filter feeders. Although there are approximately 9,000 described sponge species [8],  
59 to date only ~35 species have published transcriptomes [9-25] and only ~10 have published genomes  
60 [10,16,26–29].

61 In this study, we assembled the transcriptomes of two common and widely distributed Indo-pacific sponge  
62 species – *Carteriospongia foliascens* and *Cliona orientalis*. Both are emerging model species that have been  
63 extensively used to study the physiological and ecological effects of environmental stressors on sponges  
64 [30–37]. *C. foliascens* and *C. orientalis* are only the second members of their respective orders  
65 (Dictyoceratida and Clionaida) to have a reference transcriptome sequenced. Whilst both *C. foliascens* and  
66 *C. orientalis* host diverse populations of bacterial symbionts, e.g. [32], *C. orientalis* additionally hosts an  
67 abundant population of eukaryotic Symbiodiniaceae, *Gerakladium endoclionum* [38,39], which comprises  
68 up to 96% of its algal symbiont community [37]. We used sequences generated from the *C. orientalis*  
69 holobiont, i.e. host and symbiont, to construct a partial reference transcriptome for *Gerakladium*  
70 *endoclionum*. Matching host and symbiont transcriptomes provide a valuable tool to understand the  
71 holobiont response to changing environmental conditions and determine the cause-effect pathways for  
72 declining host health with environmental change. These data contribute substantially to available poriferan  
73 genetic resources and advance the development of these two sponge species as model systems for field  
74 and laboratory studies.

## 75 **Methods**

### 76 **Samples and sequencing**

77 Samples of *C. foliascens* and *C. orientalis* were collected in May 2015 from Fantome Is. (S 18°41.028' E 146°  
78 30.706) and Pelorus Is. (S 18°32.903' E 146° 29.172'), respectively, in the central Great Barrier Reef under  
79 permits G12/35236.1 and G13/35758.1. As *C. orientalis* is a bioeroding sponge that encrusts and erodes  
80 coral skeletons, five *C. orientalis* cores (~5 cm in diameter) were collected using an air-drill from a single  
81 individual, i.e. cloned, growing on a dead colony of *Porites* sp. An individual of *C. foliascens* was cut (cloned)  
82 into five pieces as in [32]. Sponges were healed and acclimated under natural light and flow-through  
83 seawater for 4 weeks before experiments were performed.

84 In order to capture the full complement of gene expression within the reference transcriptomes, sponges  
85 were subjected to five different treatments at the Australian Institute of Marine Science (AIMS) National  
86 Sea Simulator: i) decreased salinity, ii) elevated temperature, iii) elevated suspended sediment  
87 concentrations (SSCs) and sediment deposition, iv) light attenuation and v) no stress control. Sponge clones  
88 were used across all treatments to control for genotype, i.e. one genotype was used per species. Two  
89 clones of each species were used for each treatment. In the salinity stress treatment, salinity was  
90 decreased from 35 to 22 parts per thousand (ppt) by gradually adding flow-through reverse osmosis (RO)  
91 water to the system. Salinity was held constant at 22 ppt for 2 d with flow-through seawater maintained at  
92 600 mL min<sup>-1</sup>. In the heat stress treatment, sponges were exposed to a constant temperature of 32.5°C for  
93 1 d using methods described in [32]. In the sediment treatment, sponges were exposed to elevated SSCs at  
94 200 mg L<sup>-1</sup> for 1 d as in [40,41], using sediments described therein. In the deposition experiment,  
95 sedimentation was approximately 40 mg cm<sup>-2</sup>, measured using SedPods [42] and sponges were left covered  
96 with sediment for 1 d. In the light attenuation treatment, sponges were kept in complete darkness for 2 d.  
97 Immediately after each treatment, a sample of sponge tissue (~1 cm<sup>3</sup>) was flash frozen in liquid nitrogen  
98 and stored at -80°C [43] for RNA extraction and sequencing (RNA-seq). After exposure to the decreased

99 salinity and darkness treatments, *Cliona orientalis* was visibly bleached after 2 d, but *C. foliascens* did not  
100 exhibit any colour change. Sponges were not visibly affected, e.g. no bleaching or necrosis, by the sediment  
101 exposure or elevated seawater temperature.

102 Approximately 50 mg of each sponge clone was excised and ground using a mortar and pestle. Grinding was  
103 performed under a thin layer of liquid nitrogen to limit RNA degradation. All tools were rinsed in ethanol  
104 followed by RNase Zap (Sigma-Aldrich, USA) to remove contamination and deactivate RNA degrading  
105 enzymes. Total RNA was isolated using the Zymo ZR RNA miniprep kit (Zymo Research, USA), with in-  
106 column DNase digestion, according to the manufacturer's protocol. Total RNA was subsequently cleaned  
107 using the Zymo RNA Clean and Concentrator kit (Zymo Research, USA), following the Manufacturer  
108 protocol.

109 Total RNA quality was checked using gel electrophoresis and spectroscopy (NanoDrop 2000c  
110 Spectrophotometer, Thermo Fisher Scientific, USA), and quantified using a Quant-iT Ribogreen Assay  
111 (Thermo Fisher Scientific, USA). For each sponge species, the RNA from individual treatments was  
112 combined in equal amounts (740 ng for *C. foliascens* and 1,440 ng for *C. orientalis*) from all sponge clones,  
113 to a final total RNA concentration of 3.7 µg in 40 µl of Dnase and Rnase free water (93 ng µl<sup>-1</sup>) for *C.*  
114 *foliascens* and 7.2 µg in 55 µl of Dnase and Rnase free water (160 ng µl<sup>-1</sup>) for *C. orientalis*. For *C. foliascens*  
115 and *C. orientalis* respectively, RNA had a ratio of absorbance at 260 nm to 280 nm (A260/A280) of 1.88 and  
116 2.02 and an A260/A230 ratio of 1.11 and 1.67. To isolate eukaryotic messenger RNA (mRNA), a TruSeq  
117 Stranded mRNA-seq sample prep was performed prior to sequencing. The mRNA was sequenced across  
118 two lanes of Illumina HiSeq2500 at the Ramaciotti Centre for Genomics (University of New South Wales,  
119 Sydney, Australia) to generate 2 x 100 base pair (bp) paired-end (PE) rapid runs.

## 120 **Transcriptome assembly and annotation**

121 Sequencing produced 409 and 418 million raw reads for *C. foliascens* and *C. orientalis*, respectively (Table  
122 1). Reads were trimmed and assembled using publicly available scripts [44,45] and the protocol detailed in

123 [46]. Briefly, reads < 50 bp long were removed along with reads containing a homopolymer run of adenine  
124 (A) longer than 9 bases using *fastx\_toolkit* [47], and only reads with a PHRED quality score >20 over 80% of  
125 the read were retained. TruSeq sequencing adapters and PCR duplicates were also removed [44]. The  
126 remaining filtered, high quality reads (32.5, 50.5 million paired reads and 2.9, 8.7 million unpaired reads for  
127 *C. foliascens* and *C. orientalis*, respectively) underwent *de novo* assembly into contigs using Trinity v 2.8.5  
128 [48]. Data processing and assembly was performed at AIMS in Townsville using a high-performance  
129 computer (HPC) and on ABACUS 2.0 at the Danish e-Infrastructure Cooperation (DeiC) National HPC Center.  
130 Following assembly, additional quality control was performed to ensure that only target transcripts, i.e.  
131 derived from *C. foliascens*, *C. orientalis* or *G. endoclionum*, were included in their respective reference  
132 transcriptomes [13,46]. First, contigs less than 400 bp were removed and ribosomal RNA (rRNA),  
133 mitochondrial RNA (mtRNA), Symbiodiniaceae, and other non-metazoan (e.g. bacteria) sequences were  
134 identified using a series of hierarchical BLAST [49] searches. Transcriptomes were further blasted (BLASTn)  
135 against the *A. queenslandica* rRNA database (SILVA: ACUQ01015651) [50], which was the most complete  
136 Poriferan rRNA database. Contigs with a bit-score >45 were removed, i.e. 9 and 10 sequences in *C.*  
137 *foliascens* and *C. orientalis*, respectively. This process was repeated using the *A. queenslandica*  
138 mitochondrial genome (NCBI: NC\_008944.1 REF), resulting in 61 and 27 sequences being removed from the  
139 *C. foliascens* and *C. orientalis* assemblies respectively.  
140 Remaining contigs were blasted (BLASTx) against the most complete Poriferan (*A. queenslandica*,  
141 *aqu2.1\_Genes\_proteins.fasta*) [28,51] and *Symbiodinium kawagutii*  
142 (*Symbiodinium\_kawagutii.0819.final.gene.pep*) [52] predicted proteomes and the NCBI nonredundant (nr)  
143 protein database (downloaded September 2019). In order to be included in a sponge-specific assembly,  
144 contigs had to return a more significant match (E value  $\leq 10^{-5}$ ) to the *A. queenslandica* proteome compared  
145 to blast results from the *S. kawagutii* proteome *and also* match a metazoan sequence in the nr database or  
146 have no match in the nr database, as described in [13]. Sequences with no match to either proteome were

147 excluded from the final sponge assemblies [13], a stricter exclusion procedure than used in prior  
148 invertebrate transcriptome assemblies [46]. For the *C. orientalis* holobiont, sequences matching the *S.*  
149 *kawagutii* proteome more closely than the *A. queenslandica* proteome (E value  $\leq 10^{-5}$ ) and matching to the  
150 phylum chromerida in the nr database (or having no match in the nr database) were included in the final *G.*  
151 *endoclionum* assembly. Although *C. foliascens* does not contain intracellular Symbiodiniaceae, the  
152 decontamination step was also performed in order to remove any potential algal contamination in the  
153 sample, resulting in only a few (1,520, 1% of total number of contigs) contaminating sequences being  
154 removed.

155 Within each of the three transcriptomes, contigs were assigned to isogroups (~genes) and given gene  
156 names and gene ontologies (GO) [53] following the protocol previously described in [44,54]. Briefly, the  
157 transcriptomes underwent BLAST pairwise sequence comparison (BLASTx) to the UniProt Knowledgebase  
158 (UniprotKB/Swiss-Prot) database [55]. Significant BLASTx results (E value  $\leq 10^{-4}$ ) were used by  
159 CDS\_extractor\_v2.pl [56] to extract and identify protein coding sequences. Functional annotations were  
160 assigned to isogroups based on orthologous comparisons to the eggNOG 4.5 database [57] using eggnog-  
161 mapper [58]. Kyoto Encyclopedia of Genes and Genomes (KEGG) ids were also assigned to isogroups using  
162 the KEGG Automatic Annotation server (KAAS) [59]. The guanine-cytosine (GC) content of transcriptomes  
163 was calculated using the BMap package (Joint Genome Institute, USA) [60]. Transcriptome completeness  
164 was assessed by Benchmarking Universal Single-Copy Orthologs (BUSCO) analysis [61] on gVolante [62].

#### 165 **Assembly evaluation and quality control**

166 The holobiont assemblies of *C. foliascens* and *C. orientalis* contained 225,126 (N50 = 1,284) and 146,510  
167 (N50 = 1,949) contigs greater than 400bp in length (Table 1). After data partitioning, 67,304 and 82,895  
168 contigs, for *C. foliascens* and *C. orientalis* respectively, were considered the 'sponge-specific' transcriptome  
169 assemblies. The partitioned *G. endoclionum* transcriptome isolated from the *C. orientalis* holobiont  
170 comprised 28,670 contigs (Table 1). The *C. foliascens*, *C. orientalis*, and *G. endoclionum* transcriptomes

171 contained 15,248, 37,344, and 21,566 isogroups, respectively, with mean lengths of 3,024 (N50 = 4,355),  
172 1,756 (N50 = 2,369), and 1,375 (N50 = 1,672) bp (Table 1). The number of isogroups identified in the *C.*  
173 *foliascens* and *C. orientalis* transcriptomes was comparable to previously published sponge transcriptomes  
174 which have reported ~11,000-60,000 expressed genes [15,23,63], although there is considerable variation  
175 across species. The *G. endoclionum* transcriptome, containing 28,670 isogroups was comparable in size to  
176 the previously published *S. kawagutii* genome (36,850 genes) [52] and previously published  
177 Symbiodiniaceae transcriptomes, ranging in size from 23,777-26,986 expressed genes [64]. The respective  
178 GC content of each assembly was 40.2, 45.5, and 59%, matching reported values for metazoans (35-55%  
179 [17,27,65]) and Symbiodiniaceae (45-65% [65]). For *C. foliascens* and *C. orientalis*, the percentage of genes  
180 assigned a name or GO terms was 64 and 77%, respectively (Table 1), also comparable to other sponge  
181 transcriptomes (30-70% [15]) and those of other non-model metazoans (25-62% [14,46]). In comparison to  
182 the annotated sponge transcriptomes, only 39% of *G. endoclionum* isogroups could be assigned function or  
183 GO term annotations, however this is consistent with functional annotation of other intracellular  
184 Symbiodiniaceae transcriptomes, where between 34-44% of genes were assigned GO terms [64]. The  
185 isogroups for *C. foliascens*, *C. orientalis*, and *G. endoclionum* were assigned 3,641, 5,339 and 2,191 unique  
186 KEGG annotations respectively.

187 The representative transcriptomes for *C. foliascens* and *C. orientalis* are considered largely complete based  
188 on BUSCO analysis (92.8% and 94.2% complete, respectively) and the representation of nearly all core  
189 eukaryotic Orthologous Groups (KOGs) (97.9% and 98.7% respectively) (Table 1). BUSCO analysis of the  
190 transcriptome of *G. endoclionum* was 32.3% complete and 56% of core KOGs were identified (Table 1). A  
191 reduced BUSCO completeness in transcriptomes isolated from intracellular Symbiodiniaceae in corals (33-  
192 42%) has been previously reported [66]. The current *G. endoclionum* transcriptome contained 86% more  
193 isogroups than the Symbiodiniaceae transcripts identified within the transcriptome assembly of the closely  
194 related sponge holobiont, *Cliona varians* [17]. *C. varians* also hosts a congeneric intracellular



195 photosymbiont, *Gerakladium spongiolum* [38]. Therefore, the current transcriptome for *G. endoclionum*  
 196 was considered useful for future studies, at least for conditions *in hospite*.

197 Table 1. Assembly statistics for the *de novo* transcriptomes.

|                                             | <i>Carteriospongia foliascens</i><br>holobiont | <i>Cliona orientalis</i><br>holobiont |                                |
|---------------------------------------------|------------------------------------------------|---------------------------------------|--------------------------------|
| N raw reads (x10 <sup>6</sup> )             | 409                                            | 418                                   |                                |
| N qual filtered: PE, SE (x10 <sup>6</sup> ) | 32.5, 2.9                                      | 50.5, 8.7                             |                                |
| N contigs holobiont                         | 146,510                                        | 225,126                               |                                |
|                                             | <i>Carteriospongia foliascens</i>              | <i>Cliona orientalis</i>              | <i>Gerakladium endoclionum</i> |
| N contigs target species only               | 67,304                                         | 82,895                                | 28,670                         |
| Mean GC content target species only         | 40.2                                           | 45.5                                  | 59                             |
| N genes                                     | 15,248                                         | 37,344                                | 21,566                         |
| Mean contig length (bp)                     | 3,024                                          | 1,756                                 | 1,375                          |
| N50 (bp)                                    | 4,355                                          | 2,369                                 | 1,672                          |
| % Annotated                                 | 64                                             | 77                                    | 39                             |
| % core KOGs                                 | 97.9                                           | 98.7                                  | 56                             |
| <b>BUSCOs</b>                               |                                                |                                       |                                |
| N complete (%)                              | 908 (92.8)                                     | 921 (94.2)                            | 98 (32.3)                      |
| N partial (%)                               | 14 (1.48)                                      | 16 (1.94)                             | 16 (5.28)                      |
| N missing (%)                               | 56 (5.73)                                      | 38 (3.89)                             | 189 (62.8)                     |

198

### 199 **Re-use potential**

200 These reference transcriptomes were assembled to facilitate sponge holobiont research aimed at exploring  
 201 how both host and symbionts respond to changing environmental conditions. The transcriptomes can be  
 202 used for studies involving Tag-based RNAseq (TagSeq) [67], a highly accurate [68] and cost-effective  
 203 sequencing technique for large sample sets. Output files are also formatted for Rank-based Gene Ontology  
 204 analysis of gene expression data (GO\_MWU, [69]), and for Functional Summary and Meta-Analysis of Gene  
 205 Expression Data (KOGMWU, [70]).

### 206 **Availability of supporting data**

207 All data, including raw reads, can be accessed here:

208 [https://www.dropbox.com/sh/82ue5l16n4xzxww/AABENUi-Cdbm\\_z-6x4Gj3qlCa?dl=0](https://www.dropbox.com/sh/82ue5l16n4xzxww/AABENUi-Cdbm_z-6x4Gj3qlCa?dl=0) . Raw data has also

209 been deposited on NCBI's SRA under accession numbers PRJNA639714 and PRJNA639798 for the *C.*

210 *orientalis* holobiont and *C. foliascens*, respectively.

## 211 **Declarations**

### 212 **List of abbreviations**

213 BUSCO: Benchmarking Universal Single-Copy Orthologs; KEGG: Kyoto Encyclopedia of Genes and Genomes;

214 KOG: EuKaryotic Orthologous Groups; TagSeq: Tag-based RNAseq.

### 215 **Ethics notes and consent for publication**

216 Not applicable.

### 217 **Competing interests**

218 The authors declare that they have no competing interests.

### 219 **Funding**

220 This research was funded by the Western Australian Marine Science Institution (WAMSI) as part of the

221 WAMSI Dredging Science Node, and made possible through investment from Chevron Australia, Woodside

222 Energy Limited, BHP Billiton as environmental offsets and by co-investment from the WAMSI Joint Venture

223 partners. The views expressed herein are those of the authors and not necessarily those of WAMSI. Brian

224 W. Strehlow was supported by a University of Western Australia (UWA) Scholarship for International

225 Research Fees, University International Stipend, and UWA Safety-Net Top-Up Scholarships. Brian W.

226 Strehlow was further supported by the Villum Investigator Grant awarded to Don Canfield (No. 16518). The

227 funders had no role in study design, data collection and analysis, decision to publish, or preparation of the

228 manuscript.

### 229 **Authors' contributions**

230 BWS, MCP, CDK, AD, MR, PC, and NSW conceived and designed the experiments; BWS, MCP, and CDK  
231 performed the experiments and laboratory work; BWS performed bioinformatics analyses with extensive  
232 help and training from CDK and PL. BWS wrote the first draft. BWS, MCP, CDK, PL, AD, MR, PC, and NSW  
233 contributed to revisions of various drafts and approved the final manuscript.

#### 234 **Acknowledgements**

235 The authors are grateful to E. Botté and G. Millar for their assistance in technical aspects related to  
236 computing. They also thank the staff at the AIMS National Sea Simulator for their expertise and assistance  
237 in the tank-based experiments.

238 **References**

- 239 1. Feuda R, Dohrmann M, Pett W, Philippe H, Rota-Stabelli O, Lartillot N, et al. Improved Modeling of  
240 Compositional Heterogeneity Supports Sponges as Sister to All Other Animals. *Curr Biol*. 2017;27:3864-  
241 3870.e4.
- 242 2. IPCC. Climate Change 2014 Synthesis Report. Contrib Work Groups I, II III to Fifth Assess Rep Intergov  
243 Panel Clim Chang. 2014;1–112.
- 244 3. Bell JJ, Davy SK, Jones T, Taylor MW, Webster NS. Could some coral reefs become sponge reefs as our  
245 climate changes? *Glob Chang Biol*. 2013;19:2613–24. Available from:  
246 <http://doi.wiley.com/10.1111/gcb.12212>
- 247 4. Kroon FJ, Kuhnert PM, Henderson BL, Wilkinson SN, Kinsey-Henderson A, Abbott B, et al. River loads of  
248 suspended solids, nitrogen, phosphorus and herbicides delivered to the Great Barrier Reef lagoon. *Mar*  
249 *Pollut Bull*. Elsevier Ltd; 2012;65:167–81. Available from:  
250 <http://dx.doi.org/10.1016/j.marpolbul.2011.10.018>
- 251 5. Syvitski JPM, Vorosmarty CJ, Kettner AJ, Green P. Impact of Humans on the Flux of Terrestrial Sediment  
252 to the Global Coastal Ocean. *Science* (80). 2005;308:1364–8.
- 253 6. Maina J, de Moel H, Zinke J, Madin J, McClanahan T, Vermaat JE. Human deforestation outweighs future  
254 climate change impacts of sedimentation on coral reefs. *Nat Commun*. 2013;4:1–7. Available from:  
255 <http://www.nature.com/doi/10.1038/ncomms2986>
- 256 7. Stender Y, Jokiel PL, Rodgers KS. Thirty years of coral reef change in relation to coastal construction and  
257 increased sedimentation at Pelekane Bay, Hawaii. *PeerJ*. 2014;2:e300. Available from:  
258 <https://peerj.com/articles/300>
- 259 8. Van Soest RW., Boury-Esnault N, Hooper JNA, Rützler K, de Voogd NJ, Alvarez de Glasby B, et al. World  
260 Porifera database. Accessed at <http://www.marinespecies.org/porifera>. 2020;
- 261 9. Manousaki T, Koutsouveli V, Lagnel J, Kollias S, Tsigenopoulos CS, Arvanitidis C, et al. A de novo  
262 transcriptome assembly for the bath sponge *Spongia officinalis*, adjusting for microsymbionts. *BMC Res*  
263 *Notes*. BioMed Central; 2019;12:10–2. Available from: <https://doi.org/10.1186/s13104-019-4843-6>
- 264 10. Belahbib H, Renard E, Santini S, Jourda C, Claverie J-M, Borchiellini C, et al. New Genomic Data and  
265 Analyses Challenge the Traditional Vision of Animal Epithelium Evolution. *BMC Genomics*. *BMC Genomics*;  
266 2018;1–15.
- 267 11. Leininger S, Adamski M, Bergum B, Guder C, Liu J, Laplante M, et al. Developmental gene expression  
268 provides clues to relationships between sponge and eumetazoan body plans. *Nat Commun*. 2014;5:1–15.
- 269 12. Qiu F, Ding S, Ou H, Wang D, Chen J, Miyamoto MM. Transcriptome changes during the life cycle of the  
270 red sponge, *Mycale phyllophila* (Porifera, Demospongiae, Poecilosclerida). *Genes* (Basel). 2015;6:1023–52.
- 271 13. Kitchen SA, Crowder CM, Poole AZ, Weis VM, Meyer E. De Novo Assembly and Characterization of Four  
272 Anthozoan (Phylum Cnidaria) Transcriptomes. *G3* (Bethesda). 2015;5:2441–52. Available from:  
273 [http://apps.webofknowledge.com.gate1.inist.fr/full\\_record.do?product=UA&search\\_mode=MarkedList&qid=7&SID=T1OpnZdVDNILGAF14yu&page=1&doc=1&colName=WOS](http://apps.webofknowledge.com.gate1.inist.fr/full_record.do?product=UA&search_mode=MarkedList&qid=7&SID=T1OpnZdVDNILGAF14yu&page=1&doc=1&colName=WOS)
- 274  
275 14. Riesgo A, Andrade SCS, Sharma PP, Novo M, Pérez-Porro AR, Vahtera V, et al. Comparative description  
276 of ten transcriptomes of newly sequenced invertebrates and efficiency estimation of genomic sampling in  
277 non-model taxa. *Front Zool*. 2012;9:1–24.

- 278 15. Riesgo A, Farrar N, Windsor PJ, Giribet G, Leys SP. The analysis of eight transcriptomes from all poriferan  
279 classes reveals surprising genetic complexity in sponges. *Mol Biol Evol.* 2014;31:1102–20.
- 280 16. Ryu T, Seridi L, Moitinho-Silva L, Oates M, Liew YJ, Mavromatis C, et al. Hologenome analysis of two  
281 marine sponges with different microbiomes. *BMC Genomics.* 2016;17:1–11. Available  
282 from: <http://dx.doi.org/10.1186/s12864-016-2501-0>
- 283 17. Riesgo A, Peterson K, Richardson C, Heist T, Strehlow B, McCauley M, et al. Transcriptomic analysis of  
284 differential host gene expression upon uptake of symbionts: a case study with *Symbiodinium* and the major  
285 bioeroding sponge *Cliona varians*. *BMC Genomics.* 2014;15:376. Available from:  
286 <http://www.ncbi.nlm.nih.gov/pubmed/24885832>
- 287 18. Conaco C, Neveu P, Zhou H, Arcila ML, Degnan SM, Degnan BM, et al. Transcriptome profiling of the  
288 demosponge *Amphimedon queenslandica* reveals genome-wide events that accompany major life cycle  
289 transitions. *BMC Genomics.* 2012;13.
- 290 19. Díez-Vives C, Moitinho-Silva L, Nielsen S, Reynolds D, Thomas T. Expression of eukaryotic-like protein in  
291 the microbiome of sponges. *Mol Ecol.* 2017;26:1432–51.
- 292 20. Ereskovsky A V., Richter DJ, Lavrov D V., Schippers KJ, Nichols SA. Transcriptome sequencing and  
293 delimitation of sympatric *Oscarella* species (*O. carmela* and *O. pearsei* sp. nov) from California, USA. *PLoS*  
294 *One.* 2017;12:1–25. Available from: <http://dx.doi.org/10.1371/journal.pone.0183002>
- 295 21. Fiore CL, Labrie M, Jarett JK, Lesser MP. Transcriptional activity of the giant barrel sponge, *Xestospongia*  
296 *muta* Holobiont: Molecular evidence for metabolic interchange. *Front Microbiol.* 2015;6.
- 297 22. Germer J, Cerveau N, Jackson DJ. The Holo-Transcriptome of a Calcified Early Branching Metazoan.  
298 *Front Mar Sci.* 2017;4. Available from: <http://journal.frontiersin.org/article/10.3389/fmars.2017.00081/full>
- 299 23. Guzman C, Conaco C. Comparative transcriptome analysis reveals insights into the streamlined  
300 genomes of haplosclerid demosponges. *Sci Rep.* Nature Publishing Group; 2016;6:18774. Available from:  
301 <http://www.nature.com/articles/srep18774>
- 302 24. Guzman C, Conaco C. Gene expression dynamics accompanying the sponge thermal stress response.  
303 *PLoS One.* 2016;11:1–15. Available from: <http://dx.doi.org/10.1371/journal.pone.0165368>
- 304 25. Kenny NJ, de Goeij JM, de Bakker DM, Whalen CG, Berezikov E, Riesgo A. Towards the identification of  
305 ancestrally shared regenerative mechanisms across the Metazoa: A Transcriptomic case study in the  
306 Demosponge *Halisarca caerulea*. *Mar Genomics.* Elsevier; 2018;37:135–47. Available from:  
307 <https://doi.org/10.1016/j.margen.2017.11.001>
- 308 26. Nichols SA, Roberts BW, Richter DJ, Fairclough SR, King N. Origin of metazoan cadherin diversity and the  
309 antiquity of the classical cadherin-catenin complex. *Proc Natl Acad Sci.* 2012;109:13046–51. Available from:  
310 <http://www.pnas.org/cgi/doi/10.1073/pnas.1120685109>
- 311 27. Francis WR, Eitel M, Vargas S, Adamski M, Haddock SHD, Krebs S, et al. The genome of the contractile  
312 demosponge *Tethya wilhelma* and the evolution of metazoan neural signalling pathways. *bioRxiv.*  
313 2017;preprint. Available from: <https://www.biorxiv.org/content/biorxiv/early/2017/04/12/120998.full.pdf>
- 314 28. Srivastava M, Simakov O, Chapman J, Fahey B, Gauthier M, Mitros T, et al. The *Amphimedon*  
315 *queenslandica* genome and the evolution of animal complexity. *Nature.* 2010;466. Available from:  
316 <http://dx.doi.org/10.1038/nature09201>
- 317 29. Fortunato SA V, Adamski M, Ramos OM, Leininger S, Liu J, Ferrier DEK, et al. Calcisponges have a  
318 ParaHox gene and dynamic expression of dispersed NK homeobox genes. *Nature.* Nature Publishing Group;

- 319 2014;514:620–3. Available from: <http://dx.doi.org/10.1038/nature13881>
- 320 30. Abdul Wahab MA, Maldonado M, Luter HM, Jones R, Ricardo G. Effects of sediment resuspension on  
321 the larval stage of the model sponge *Carteriospongia foliascens*. *Sci Total Environ*. Elsevier B.V;  
322 2019;695:133837. Available from: <https://doi.org/10.1016/j.scitotenv.2019.133837>
- 323 31. Bennett HM, Altenrath C, Woods L, Davy SK, Webster NS, Bell JJ. Interactive effects of temperature and  
324 pCO<sub>2</sub> on sponges: from the cradle to the grave. *Glob Chang Biol*. 2016;1–16. Available from:  
325 <http://doi.wiley.com/10.1111/gcb.13474>
- 326 32. Pineda M-C, Strehlow B, Duckworth A, Doyle J, Jones R, Webster NS. Effects of light attenuation on the  
327 sponge holobiont- implications for dredging management. *Sci Rep*. Nature Publishing Group; 2016;6:1–13.  
328 Available from: <http://dx.doi.org/10.1038/srep39038>
- 329 33. Pineda M-C, Strehlow B, Kamp J, Duckworth A, Jones R, Webster NS. Effects of combined dredging-  
330 related stressors on sponges: A laboratory approach using realistic scenarios. *Sci Rep*. 2017;7:1–14.
- 331 34. Pineda M-C, Strehlow B, Sternel M, Duckworth A, Haan J den, Jones R, et al. Effects of sediment  
332 smothering on the sponge holobiont with implications for dredging management. *Sci Rep*. Springer US;  
333 2017;7:1–15. Available from: <http://dx.doi.org/10.1038/s41598-017-05243-x>
- 334 35. Pineda M-C, Strehlow B, Sternel M, Duckworth A, Jones R, Webster NS. Effects of suspended sediments  
335 on the sponge holobiont with implications for dredging management. *Sci Rep*. Springer US; 2017;7:1–15.  
336 Available from: <http://dx.doi.org/10.1038/s41598-017-05241-z>
- 337 36. Ramsby BD, Hoogenboom MO, Smith HA, Whalan S, Webster NS. The bioeroding sponge *Cliona*  
338 *orientalis* will not tolerate future projected ocean warming. *Sci Rep*. Springer US; 2018;1–13. Available  
339 from: [www.nature.com/scientificreports](http://www.nature.com/scientificreports)
- 340 37. Ramsby BD, Hoogenboom MO, Whalan S, Webster NS. Elevated seawater temperature disrupts the  
341 microbiome of an ecologically important bioeroding sponge. *Mol Ecol*. 2018;27:2124–37.
- 342 38. Ramsby BD, Hill MS, Thornhill DJ, Steenhuizen SF, Achlatis M, Lewis AM, et al. Sibling species of  
343 mutualistic *Symbiodinium* clade G from bioeroding sponges in the western Pacific and western Atlantic  
344 oceans. *J Phycol*. 2017;53:951–60.
- 345 39. LaJeunesse TC, Parkinson JE, Gabrielson PW, Jeong HJ, Reimer JD, Voolstra CR, et al. Systematic Revision  
346 of Symbiodiniaceae Highlights the Antiquity and Diversity of Coral Endosymbionts. *Curr Biol*. Elsevier Ltd.;  
347 2018;28:2570-2580.e6. Available from: <https://doi.org/10.1016/j.cub.2018.07.008>
- 348 40. Bessell-Browne P, Negri AP, Fisher R, Clode PL, Jones R. Impacts of turbidity on corals: the relative  
349 importance of light limitation and suspended sediments. *Mar Pollut Bull*. 2017;1–24.
- 350 41. Bessell-Browne P, Fisher R, Duckworth A, Jones R. Mucous sheet production in *Porites*: an effective  
351 bioindicator of sediment related pressures. *Ecol Indic*. Elsevier Ltd; 2017;77:276–85.
- 352 42. Field ME, Chezar H, Storlazzi CD. SedPods: A low-cost coral proxy for measuring net sedimentation.  
353 *Coral Reefs*. 2013;32:155–9.
- 354 43. Riesgo A, Pérez-Porro AR, Carmona S, Leys SP, Giribet G. Optimization of preservation and storage time  
355 of sponge tissues to obtain quality mRNA for next-generation sequencing. *Mol Ecol Resour*. 2012;12.  
356 Available from: <http://dx.doi.org/10.1111/j.1755-0998.2011.03097.x>
- 357 44. Matz M V. Assembly and annotation of transcriptomes de novo. Github.  
358 2015;URL:<https://github.com/z0on/annotatingTranscriptomes>. Available from:  
359 <https://github.com/z0on/annotatingTranscriptomes>

- 360 45. Meyer E. A collection of scripts for analyzing transcriptome assemblies. Github.  
361 2016;URL:[https://github.com/Eli-Meyer/transcriptome\\_utilities](https://github.com/Eli-Meyer/transcriptome_utilities). Available from: [https://github.com/Eli-Meyer/transcriptome\\_utilities](https://github.com/Eli-Meyer/transcriptome_utilities)  
362 Meyer/transcriptome\_utilities
- 363 46. Kenkel CD, Bay LK. Novel transcriptome resources for three scleractinian coral species from the Indo-  
364 Pacific. *Gigascience*. 2017;6:1–4.
- 365 47. The Hannon Lab. FASTX-Toolkit. 2010;URL:[http://hannonlab.cshl.edu/fastx\\_toolkit/](http://hannonlab.cshl.edu/fastx_toolkit/). Available from:  
366 [http://hannonlab.cshl.edu/fastx\\_toolkit/](http://hannonlab.cshl.edu/fastx_toolkit/)
- 367 48. Grabherr MG, Haas BJ, Yassour M, Levin JZ, Thompson DA, Amit I, et al. Full-length transcriptome  
368 assembly from RNA-Seq data without a reference genome. *Nat Biotechnol*. 2011;29:644–52. Available  
369 from: <http://www.nature.com/doi/10.1038/nbt.1883>
- 370 49. Altschul SF, Gish W, Miller W, Myers EW, Lipman DJ. Basic local alignment search tool. *J Mol Biol*.  
371 1990;215:403–10. Available from: <http://www.sciencedirect.com/science/article/pii/S0022283605803602>
- 372 50. Quast C, Pruesse E, Yilmaz P, Gerken J, Schweer T, Yarza P, et al. The SILVA ribosomal RNA gene  
373 database project: Improved data processing and web-based tools. *Nucleic Acids Res*. 2013;41.
- 374 51. Fernandez-Valverde SL, Calcino AD, Degnan BM. Deep developmental transcriptome sequencing  
375 uncovers numerous new genes and enhances gene annotation in the sponge *Amphimedon queenslandica*.  
376 *BMC Genomics*. 2015;16:387. Available from:  
377 [http://apps.webofknowledge.com.gate1.inist.fr/full\\_record.do?product=UA&search\\_mode=GeneralSearch](http://apps.webofknowledge.com.gate1.inist.fr/full_record.do?product=UA&search_mode=GeneralSearch&qid=11&SID=T10pnZdVDNILGAfi4yu&page=2&doc=13&cacheurlFromRightClick=no)  
378 [&qid=11&SID=T10pnZdVDNILGAfi4yu&page=2&doc=13&cacheurlFromRightClick=no](http://apps.webofknowledge.com.gate1.inist.fr/full_record.do?product=UA&search_mode=GeneralSearch&qid=11&SID=T10pnZdVDNILGAfi4yu&page=2&doc=13&cacheurlFromRightClick=no)
- 379 52. Lin S, Cheng S, Song B, Zhong X, Lin X, Li W, et al. The *Symbiodinium kawagutii* genome illuminates  
380 dinoflagellate gene expression and coral symbiosis. *Science (80- )*. 2015;350:691–4. Available from:  
381 <http://www.sciencemag.org/cgi/doi/10.1126/science.aad0408>
- 382 53. Gene Ontology Consortium. The Gene Ontology Consortium. Gene ontology: tool for the unification of  
383 biology. *Nat Genet*. 2000;25:25–9.
- 384 54. Dixon GB. Genomic determinants of coral heat tolerance across latitudes. *Science (80- )*. 2013;333:1689–  
385 99.
- 386 55. The UniProt Consortium. UniProt: the universal protein knowledgebase. *Nucleic Acids Res*.  
387 2017;43:D2158–69. Available from: <http://nar.oxfordjournals.org/cgi/content/long/43/D1/D204>
- 388 56. Matz M V, Aglyamova G V. Cost-efficient genome-wide gene expression profiling. Github.  
389 2017;URL:[https://github.com/z0on/tag-based\\_RNAseq](https://github.com/z0on/tag-based_RNAseq).
- 390 57. Huerta-Cepas J, Szklarczyk D, Forslund K, Cook H, Heller D, Walter MC, et al. EGGNOG 4.5: A hierarchical  
391 orthology framework with improved functional annotations for eukaryotic, prokaryotic and viral sequences.  
392 *Nucleic Acids Res*. 2016;
- 393 58. Huerta-Cepas J, Forslund K, Coelho LP, Szklarczyk D, Jensen LJ, Von Mering C, et al. Fast genome-wide  
394 functional annotation through orthology assignment by eggNOG-mapper. *Mol Biol Evol*. 2017;
- 395 59. Moriya Y, Itoh M, Okuda S, Yoshizawa AC, Kanehisa M. KAAS: An automatic genome annotation and  
396 pathway reconstruction server. *Nucleic Acids Res*. 2007;35.
- 397 60. Bushnell B. BMAP: a fast, accurate, splice-aware aligner. *Jt. Genome Institute, Dep. energy*. 2014.
- 398 61. Simão FA, Waterhouse RM, Ioannidis P, Kriventseva E V., Zdobnov EM. BUSCO: Assessing genome  
399 assembly and annotation completeness with single-copy orthologs. *Bioinformatics*. 2015;31:3210–2.

- 400 62. Nishimura O, Hara Y, Kuraku S. gVolante for standardizing completeness assessment of genome and  
401 transcriptome assemblies. *Bioinformatics*. 2017; <https://gvolante.riken.jp/analysis.html>.
- 402 63. López-Maury L, Marguerat S, Bähler J. Tuning gene expression to changing environments: from rapid  
403 responses to evolutionary adaptation. *Nat Rev Genet*. 2008;9:583–93. Available from:  
404 <http://www.nature.com/doi/10.1038/nrg2398>
- 405 64. Ladner JT, Barshis DJ, Palumbi SR. Protein evolution in two co-occurring types of Symbiodinium: An  
406 exploration into the genetic basis of thermal tolerance in Symbiodinium clade D. *BMC Evol Biol*. 2012;12.
- 407 65. Karimi E, Ramos M, Gonçalves JMS, Xavier JR, Reis MP, Costa R. Comparative metagenomics reveals the  
408 distinctive adaptive features of the *Spongia officinalis* endosymbiotic consortium. *Front Microbiol*. 2017;8.
- 409 66. Liu H, Stephens TG, González-Pech RA, Beltran VH, Lapeyre B, Bongaerts P, et al. *Symbiodinium*  
410 genomes reveal adaptive evolution of functions related to coral-dinoflagellate symbiosis. *Commun Biol*.  
411 Springer US; 2018;1:1–11. Available from: <http://dx.doi.org/10.1038/s42003-018-0098-3>
- 412 67. Meyer E, Aglyamova G V., Matz M V. Profiling gene expression responses of coral larvae (*Acropora*  
413 *millepora*) to elevated temperature and settlement inducers using a novel RNA-Seq procedure. *Mol Ecol*.  
414 2011;20:3599–616.
- 415 68. Lohman BK, Weber JN, Bolnick DI. Evaluation of TagSeq, a reliable low-cost alternative for RNAseq. *Mol*  
416 *Ecol Resour*. 2016;
- 417 69. Matz M V. Rank-based Gene Ontology analysis of gene expression data. 2015; Available from:  
418 [https://github.com/z0on/GO\\_MWU](https://github.com/z0on/GO_MWU)
- 419 70. Matz M V. KOGMWU: Functional Summary and Meta-Analysis of Gene Expression Data. 2019; Available  
420 from: <https://cran.r-project.org/package=KOGMWU>
- 421
